# Supplementary material
Source: PubMed Central journal article supplement (PMC6638003)
Supplement: MPP-19-827-s002.pdf [file MPP-19-827-s002.pdf]

802 **Table S1.** Primers used in this study

803

| Primer                         | Sequences (5' to 3')                                                       |
|--------------------------------|----------------------------------------------------------------------------|
| <b>Primers for mutation</b>    |                                                                            |
| lon-F                          | ATGAATCCTGAGCGTTCTGAACGCATTGAAATCCCTGTGTTGCCGTTGCGCGATTG<br>TGTAGGCTGGAGCT |
| lon-R                          | CTATTTTACCGAGGCAACCTGCATGCCATAAGGTGCATTTTGCAGCGCCAATTCCG<br>GGGATCCGTCGACC |
| lon-C1                         | CAGCAGGTGTCTGGTGAATA                                                       |
| lon-C2                         | CGGCCTGCAAAGATTCTGTT                                                       |
| Cm1                            | TTATACGCAAGGCGACAAGG                                                       |
| Cm2                            | GATCTTCCGTCACAGGTAGG                                                       |
| Km1                            | CAGTCATAGCCGAATAGCCT                                                       |
| Km2                            | CGGTGCCCTGAATGAACTGC                                                       |
| <b>Primers for qRT-PCR</b>     |                                                                            |
| rpoD-rt1                       | ACATGCGTGAAAATGGGTACGGT                                                    |
| rpoD-rt2                       | TGATGCCGTCTTCGATGCGTT                                                      |
| hrpL-rt1                       | TAAAGGCAATGCCAAACACC                                                       |
| hrpL-rt2                       | GACGCGTGCATCATTTTATT                                                       |
| hrpA-rt1                       | GAGTCCATTTTGCCATCCAG                                                       |
| hrpA-rt2                       | TGGCAGGCAGTTCACCTTACA                                                      |
| hrpS-rt1                       | AATGCTACGCGTGCTGGAAA                                                       |
| hrpS-rt2                       | AACAATGGCGTTTGCGTTGC                                                       |
| resA-rt1                       | TTAAACCTGTCTGTGCGTCA                                                       |
| resA-rt2                       | AGAAACCGTTTTGGCTTTGA                                                       |
| amsG-rt1                       | CAAAGAGGTGCTGGAAGAGG                                                       |
| amsG-rt2                       | GTTCCATAGTTGCGGCAGTT                                                       |
| flhD-rt1                       | TGGTTTGTCAGTTCCGCTTC                                                       |
| flhD-rt2                       | TTTTCGGCGTCTCTTGTCT                                                        |
| csrA-rt1                       | TCATGATCGGTGATGAGGTG                                                       |
| csrA-rt2                       | ACTCGTTTGCTGCGTCTTTT                                                       |
| csrB-rt1                       | CCTGACGTCGATCCTTTGAC                                                       |
| csrB-rt2                       | GTAAGGGACATTCGGCAGTC                                                       |
| <b>Primers for cloning</b>     |                                                                            |
| hrpS-His6-F                    | AGTAGGTACCATGCATGAACGCCTGACG                                               |
| hrpS-His6-R                    | AGTAGAATTCCTAGTGATGATGATGATGATGCTGAGCAATAACCCGACCGGTG                      |
| resA-His6-F                    | TCAGGGTACCTACTGGACTGTTTGCCTGAT                                             |
| resA-His6-R                    | TCAGGAATTCCTAGTGATGATGATGATGATGATGTCTTTCGTTAACATAAAATGCCG                  |
| resB-His6-F                    | TCAGGGTACCCGATGTTCTGATCACTGACC                                             |
| resB-His6-R                    | TCAGGAATTCCTAGTGATGATGATGATGATGATGTTTATCTACCGGCGTCATGCTT                   |
| lon-His6-F                     | AGTACTCGAGTAAGCGAGCTAAGCGAGGAA                                             |
| lon-His6-R                     | TCAGGAATTCCTAGTGATGATGATGATGATGATGTTTTACCGAGGCAACCTGCATG                   |
| <b>Primers for inverse PCR</b> |                                                                            |
| PvuI-left                      | GAAAAACAGCATTCCAGGTATTAGA                                                  |
| PvuI-right                     | AAGTTTATGCATTTCTTTCCAGACT                                                  |
| KAN-2 FP-1                     | ACCTACAACAAAGCTCTCATCAACC                                                  |
| KAN-2 RP-1                     | GCAATGTAACATCAGAGATTTTGAG                                                  |
| <b>Primers for EMSA</b>        |                                                                            |
| EMSAcsrB F                     | CCGAATTAAGCCGCTGCCCTGTACGAGATCTCTTACAGATTATGTAAGAGATCGC<br>TT              |
| EMSAcsrB R                     | AAGCGATCTCTTACATAATCTGTAAGAGATCTCGTACAGGGCAGGCGGCTTAATTC<br>GG             |
| EMSAhrpS-F                     | CATTAGTCATTGCCTGATAACTTAGGAATGCTCTTATATTTGTCTCTCGCCCTTCC<br>CT             |
| EMSAhrpS-R                     | AGGGAAGGGCGAGAGACAAATATAAGAGCATTCTAAGTTATCAGGCAATGACTA<br>ATG              |

804
